# Supplementary material for: An Integrated Microfluidic Biosensing System Based on a Versatile Valve and Recombinase Polymerase Amplification for Rapid and Sensitive Detection of Salmonella typhimurium
Source: Biosensors (Basel). 2023 Aug 4;13(8):790. doi: 10.3390/bios13080790 (PMC10452558; doi:10.3390/bios13080790)
Supplement: Supplementary file 1 [file biosensors-13-00790-s001.zip]

Archive with 9 entries (9 files):
- Figures/Figure S1.tif
- Figures/Figure S2.tif
- Figures/Figure S3.tif
- Figures/Figure S4.tif
- Figures/Figure S5.tif
- Figures/Figure S6.tif
- Figures/Figure S7.tif
- Revised Supplementary File.pdf
- Video/Video S1. Working principle of the versatile valve.mp4
